# Supplementary material
Source: PubMed Central journal article supplement (PMC4636940)
Supplement: NIHMS728915-supplement-307207R2_Acknowledgment_Permissions.pdf [file NIHMS728915-supplement-307207R2_Acknowledgment_Permissions.pdf]

## Circulation Research

---

**From:** Jayesh V Betala <[jbetala@clemson.edu](mailto:jbetala@clemson.edu)>  
**Sent:** Tuesday, September 29, 2015 4:09 PM  
**To:** [circulation.research@circresearch.com](mailto:circulation.research@circresearch.com)  
**Cc:** Nasim Nosoudi  
**Subject:** Re: Acknowledgement consent for manuscript no: CIRCRES/2015/307207R1

Hello,

I am satisfied with the acknowledgement for the manuscript no: CIRCRES/2015/307207R1.

Thank you,

Best,  
Jayesh V Betala  
Graduate Teaching Assistant  
Department of Bioengineering  
Clemson University  
Email: [jbetala@clemson.edu](mailto:jbetala@clemson.edu)

## Circulation Research

---

**From:** Martine LaBerge <laberge@clemson.edu>  
**Sent:** Wednesday, September 30, 2015 12:02 PM  
**To:** circulation.research@circresearch.com  
**Cc:** Jayesh V Betala; Narendra Vyavahare  
**Subject:** RE: CIRCRES/2015/307207R1 FW: Circulation research paper

Good morning, **RE: CIRCRES/2015/307207R1**

I am honored of having been able to provide support to Dr. Vyavahare's research group to conduct the work to be published in Circulation.

We thank you for the opportunity to be acknowledged.

Best regards,

Martine LaBerge

Martine LaBerge, Ph.D., F.B.S.E.  
Professor and Chair of Bioengineering  
Executive Director, CUBEInC  
Clemson University  
301 Rhodes, Clemson, SC 29634-0905  
Phone: 864-656-5557 (Clemson Campus)  
Phone: 864-284-6239 (CUBEInC Greenville)  
Office Manager (Teri Townsend): 864-656-5556  
Fax: 864-656-4466  
E-mail: [laberge@clemson.edu](mailto:laberge@clemson.edu)

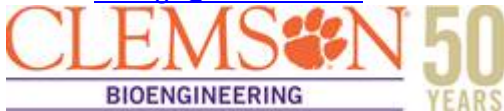

---

**From:** Narendra Vyavahare  
**Sent:** Wednesday, September 30, 2015 11:58 AM  
**To:** Martine LaBerge <laberge@clemson.edu>; Jayesh V Betala <jbetala@clemson.edu>  
**Subject:** Circulation research paper

Martine: Our high-impact paper is getting accepted in Circulation Research. We have acknowledged you and Jayesh for providing cells. The editor wants an email from both of you suggesting you are ok with it. See below

All persons acknowledged by name in the manuscript must send an email to [circulation.research@circresearch.com](mailto:circulation.research@circresearch.com) citing their permission to be acknowledged.

Naren Vyavahare, Ph.D.  
Hunter Endowed Chair and Professor of Bioengineering  
Director, South Carolina Bioengineering Center  
of Regeneration and Formation of Tissues (SC BioCRAFT)  
Department of Bioengineering, Clemson University
